# Supplementary material for: miR-612 suppresses the invasive-metastatic cascade in hepatocellular carcinoma
Source: PubMed Central journal article supplement — J Exp Med. 2013 Apr 8;210(4):789–803. doi: 10.1084/jem.20120153 (PMC3620363; doi:10.1084/jem.20120153), 2013-04-08
Supplement: supp_jem.20120153_JEM_20120153_sm.pdf [file supp_jem.20120153_JEM_20120153_sm.pdf]

## SUPPLEMENTAL MATERIAL

Tao et al., <http://www.jem.org/cgi/content/full/jem.20120153/DC1>**Table S1.** Clinicopathological features of HCC patients

| Features                            | Values/Counts<br>( <i>n</i> = 37) |
|-------------------------------------|-----------------------------------|
| Age (years, median (range))         | 55 (30-74)                        |
| Gender (male/female)                | 29/8                              |
| Liver cirrhosis (yes/no)            | 28/9                              |
| Tumor size (cm, median (range))     | 4.0 (2.0-15)                      |
| Encapsulation (complete/none)       | 21/16                             |
| Tumor differentiation (I-II/III-IV) | 30/7                              |
| Intrahepatic metastasis (yes/no)    | 5/32                              |
| Microvascular invasion (yes/no)     | 13/24                             |
| Portal venous emboli (yes/no)       | 1/36                              |
| TNM stage (I/II/IIIa/Iva)           | 2/18/15/2                         |

**Table S2.** Relationships between intratumoral levels of miR-612 and clinicopathological features

| Variables                            | miR-612 level |        |                |       | P-value |
|--------------------------------------|---------------|--------|----------------|-------|---------|
|                                      | High (n = 19) |        | Low (n = 18)   |       |         |
|                                      | Values/counts | %      | Values/counts  | %     |         |
| Age, years <sup>a</sup>              | 51.89 ± 2.13  |        | 53.67 ± 2.49   |       | 0.5909  |
| Gender <sup>b</sup>                  |               |        |                |       | 1.0000  |
| Male                                 | 15            | 78.95  | 14             | 77.78 |         |
| Female                               | 4             | 21.05  | 4              | 22.22 |         |
| Liver cirrhosis <sup>b</sup>         |               |        |                |       | 1.0000  |
| Yes                                  | 14            | 73.68  | 14             | 77.78 |         |
| No                                   | 5             | 26.32  | 4              | 22.22 |         |
| Tumor size (cm)                      | 3.8 ± 0.40    |        | 7.21 ± 0.87    |       | 0.0021  |
| Tumor encapsulation <sup>c</sup>     |               |        |                |       | 0.1914  |
| Complete                             | 13            | 68.42  | 8              | 45.44 |         |
| None                                 | 6             | 31.58  | 10             | 55.56 |         |
| Tumor differentiation <sup>b</sup>   |               |        |                |       | 0.2320  |
| I–II                                 | 17            | 89.47  | 13             | 72.22 |         |
| III–IV                               | 2             | 11.53  | 5              | 27.78 |         |
| Intrahepatic metastasis <sup>c</sup> |               |        |                |       | 0.0197  |
| Yes                                  | 0             | 0.00   | 5              | 27.78 |         |
| No                                   | 19            | 100.00 | 13             | 72.22 |         |
| Microvascular invasion <sup>b</sup>  |               |        |                |       | 0.0003  |
| Yes                                  | 1             | 10.00  | 11             | 64.71 |         |
| No                                   | 18            | 90.00  | 7 <sup>e</sup> | 35.29 |         |
| TNM stage <sup>d</sup>               |               |        |                |       | 0.0044  |
| I                                    | 2             | 10.00  | 1              | 0.00  |         |
| II                                   | 13            | 70.00  | 4              | 23.53 |         |
| IIIa                                 | 4             | 20.00  | 11             | 64.71 |         |
| IVa                                  | 0             | 0.00   | 2              | 11.76 |         |

<sup>a</sup>Student's *t* test, data described as mean ± SEM.

<sup>b</sup>Fisher's exact test.

<sup>c</sup>Pearson chi-square test; one-sided.

<sup>d</sup>Chi-square test for trend.

<sup>e</sup> One patient with uncertain microvascular invasion is classified into this subgroup.
